# Supplementary material for: Cognitive-Motor Learning in Virtual Reality Enhances Processing Speed and Processing Speed Efficacy in Healthy Adults
Source: Research Square preprint supplement (doi:10.21203/rs.3.rs-8429022/v1), 2026-02-04
Supplement: Supplementary file 1 [file 0bced37928040586b04851f3.docx]

**SUPPLEMENTARY TABLES**

**Supplementary Table 1.** Comparisons within both the experimental and control groups showing the median and significance for correct GO and NO-GO decisions between the following time points: BL to PT, PT to TT, and BL to TT. Significance was determined using the Wilcoxon Sign Rank test.

| Measure | | Experimental | | Control | |
| --- | --- | --- | --- | --- | --- |
| Median | P-value | Median | P-value |
| Correct GO Decisions | BL-PT | 22.6 - 23.6 | 0.105 | 22.4 - 23.4 | 0.189 |
| PT-TT | 23.6 - 23.6 | Not Sig. | 23.4 - 23.6 | Not Sig |
| BL-TT | 22.6 - 23.6 | < 0.01 | 22.4 - 23.6 | < 0.05 |
| Correct NO-GO Decisions | BL-PT | 22.6 - 24.0 | < 0.001 | 22.4 - 23.6 | < 0.001 |
| PT-TT | 24.0 - 23.2 | < 0.001 | 23.6 - 23.6 | Not Sig |
| BL-TT | 22.6 - 23.2 | 0.053 | 22.4 - 23.6 | < 0.001 |

**Supplementary Table 2.** Comparisons between the experimental and control groups for correct GO and NO-GO decisions at each testing point. Significance was determined using the Mann-Whitney U test.

| Measure | | Experimental Median | Control Median | P-value |
| --- | --- | --- | --- | --- |
| Correct GO Decisions | BL | 22.6 | 22.4 | Not Sig |
| PT | 23.6 | 23.4 | Not Sig |
| TT | 23.6 | 23.6 | Not Sig |
| Correct NO-GO Decisions | BL | 22.6 | 22.4 | Not Sig |
| PT | 24.0 | 23.6 | < 0.01 |
| TT | 23.2 | 23.6 | Not Sig |
